# Supplementary material for: Changes of articular cartilage and subchondral bone after extracorporeal shockwave therapy in osteoarthritis of the knee
Source: PubMed Central journal article supplement — Int J Med Sci. 2017 Feb 23;14(3):213–23. doi: 10.7150/ijms.17469 (PMC5370283; doi:10.7150/ijms.17469), 2017-02-23
Supplement: ijmsv14p0213s1.pdf [file ijmsv14p0213s1.pdf]

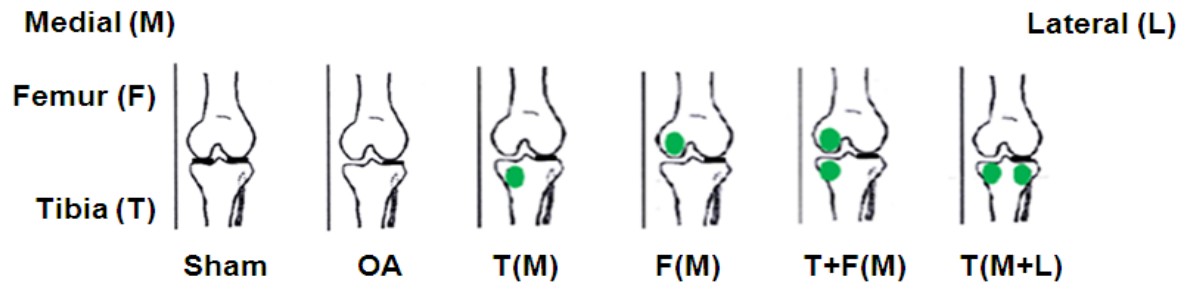

**B**

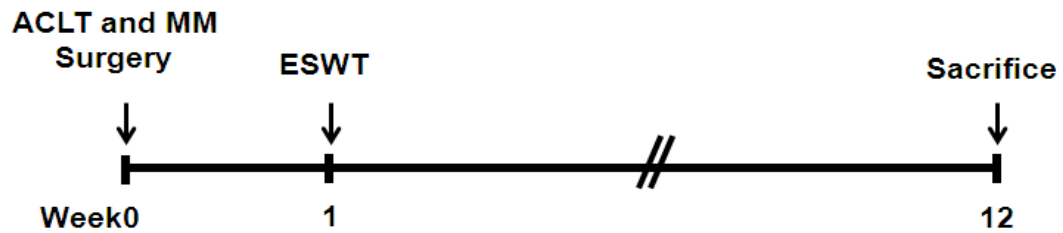

**Supplemental Figure 1. The locations of shockwave application and the study design.** (A) The knee sketch outlined the locations (in color dots) of shockwave application in different groups of animals (n = 8 in each groups). (B) Graphic scheme depicted the study design of this experiment including knee surgery, shockwave application and sacrifice of animals.
